# Supplementary material for: Does the prehospital National Early Warning Score predict the short-term mortality of unselected emergency patients?
Source: PubMed Central journal article supplement (PMC5992854; doi:10.1186/s13049-018-0514-1), 2018-06-07

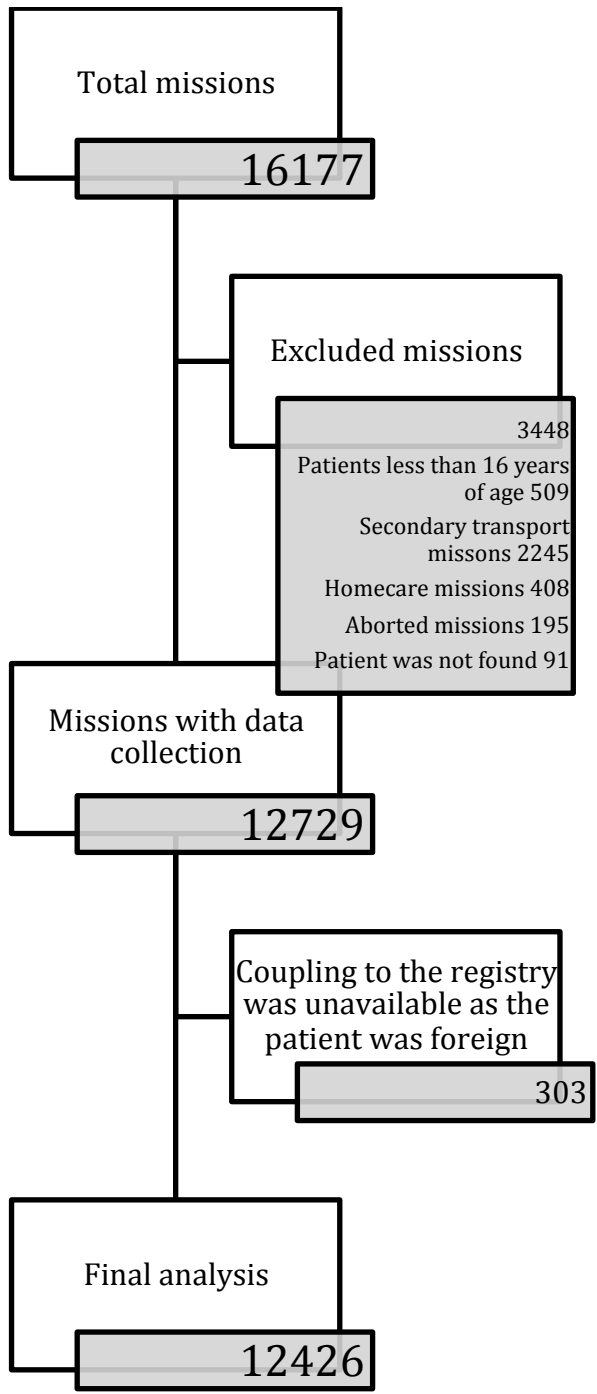

Supplement: 13049_2018_514_MOESM2_ESM.pdf [file 13049_2018_514_MOESM2_ESM.pdf]
